# Supplementary material for: Specificity of high resolution analysis of naphthenic acids in aqueous environmental matrices
Source: Royal Society of Chemistry journal article supplement (doi:10.1039/c6ay01912a), 2016-01-01
Supplement: c6ay01912a1.pdf [file c6ay01912a1.pdf]

## SUPPLEMENTARY INFORMATION

### Method Performance for Ultra-Trace Level Naphthenic Acids

1. **System Suitability:** The suitability of the instrument system was assessed at the start and end of each analytical sequence by replicate injections of a solution of internal standard. The internal standard employed was decanoic-d3 acid at a final concentration of 0.03 µg/mL in 0.1% v/v concentrated ( $\geq 28\%$  ammonia) ammonium hydroxide solution.

Table 1: Example System Suitability

| Sample ID          | ISTD Response | Retention Time (min) |
|--------------------|---------------|----------------------|
| System Suitability | 11417554      | 7.276                |
|                    | 11304680      | 7.281                |
|                    | 11277335      | 7.278                |
|                    | 11370944      | 7.277                |
|                    | 11521031      | 7.277                |
|                    | 11476377      | 7.277                |
| <b>Mean</b>        | 11394654      | 7.278                |
| <b>Std Dev</b>     | 95494         | 0.002                |
| <b>%RSD</b>        | 0.8           | 0.024                |

2. **Regression:** Duplicate calibration standards in the concentration range 0.011 to 0.905 µg/mL, were analyzed at the beginning and end of each analytical sequence. Standards were prepared from acid extractable organics (AEOs, derived from fresh OSPW) as reference material in 0.1% v/v concentrated ( $\geq 28\%$  ammonia) ammonium hydroxide solution and spiked with internal standards prior to analysis. Method blanks of 0.1% v/v ammonium hydroxide were analyzed before each calibration curve. For calculation of sample concentrations the method employed weighted 1/x linear regression using Graph Pad Prism software followed by data reduction in Microsoft Excel. Example results for the standards and regression are provided in **Table 2**.

**Table 2: Example Weighted 1/x Linear Regression**

| <b>Sample ID</b> | <b>Nominal Conc. (µg/mL)</b> | <b>ISTD Response</b> | <b>Pooled Ion Response</b> | <b>Response Ratio</b> | <b>Measured Conc. (µg/mL)</b> | <b>% Recovery</b> |
|------------------|------------------------------|----------------------|----------------------------|-----------------------|-------------------------------|-------------------|
| <b>Curve 1</b>   | 0.011                        | 11592558             | 7671790                    | 0.661786              | 0.012                         | 104               |
|                  | 0.023                        | 11396177             | 14700024                   | 1.289908              | 0.023                         | 103               |
|                  | 0.068                        | 10975323             | 42495888                   | 3.871949              | 0.071                         | 104               |
|                  | 0.226                        | 10520386             | 136634462                  | 12.987590             | 0.239                         | 106               |
|                  | 0.452                        | 10031740             | 263052210                  | 26.221992             | 0.483                         | 107               |
|                  | 0.905                        | 9423950              | 474303977                  | 50.329637             | 0.927                         | 102               |
| <b>Curve 2</b>   | 0.011                        | 11930620             | 7284313                    | 0.610556              | 0.011                         | 96                |
|                  | 0.023                        | 11718018             | 13877257                   | 1.184267              | 0.021                         | 95                |
|                  | 0.068                        | 11502654             | 40300973                   | 3.503624              | 0.064                         | 94                |
|                  | 0.226                        | 11260146             | 132762166                  | 11.790448             | 0.217                         | 96                |
|                  | 0.452                        | 10690948             | 254958361                  | 23.848059             | 0.439                         | 97                |
|                  | 0.905                        | 10143237             | 476998464                  | 47.026255             | 0.866                         | 96                |
| <b>Mean</b>      |                              |                      |                            |                       | <b>%Recovery</b>              | <b>100</b>        |

3. **Method Detection Limit:** The Method Detection Limit (MDL) was set at 99% confidence level above zero. Standard limit of detection (LOD) replicates prepared at 0.002 µg/mL and 0.005 µg/mL both showed a calculated MDL of 0.0003 µg/mL. Results for LOD samples are provided in **Table 3**.

**Table 3: LOD Replicate Results**

| Nominal Conc. (µg/mL) | ISTD Response | Pooled Ion Response | Response Ratio | Measured Conc. (µg/mL) |     |
|-----------------------|---------------|---------------------|----------------|------------------------|-----|
| 0.0023                | 11226498      | 1401569             | 0.124845       | 0.0018                 | BQL |
| 0.0023                | 11734502      | 1530414             | 0.130420       | 0.0019                 | BQL |
| 0.0023                | 11100041      | 1492707             | 0.134478       | 0.0020                 | BQL |
| 0.0023                | 11622153      | 1542185             | 0.132694       | 0.0020                 | BQL |
| 0.0023                | 10837031      | 1463851             | 0.135079       | 0.0020                 | BQL |
| 0.0023                | 11932868      | 1546055             | 0.129563       | 0.0019                 | BQL |
| 0.0023                | 11631061      | 1602647             | 0.137790       | 0.0021                 | BQL |
| 0.0023                | 11230360      | 1618444             | 0.144113       | 0.0022                 | BQL |
| 0.0023                | 11469794      | 1558289             | 0.135860       | 0.0020                 | BQL |
| 0.0023                | 11024504      | 1404196             | 0.127370       | 0.0019                 | BQL |
| <b>Mean</b>           |               |                     |                | 0.0020                 |     |
| <b>Std Dev</b>        |               |                     |                | 0.0001                 |     |
| <b>%RSD</b>           |               |                     |                | 5.2                    |     |
| <b>MDL</b>            |               |                     |                | 0.0003                 |     |
| 0.0045                | 10914611      | 2824065             | 0.258742       | 0.0043                 | BQL |
| 0.0045                | 10815706      | 2782113             | 0.257229       | 0.0043                 | BQL |
| 0.0045                | 11030049      | 2903949             | 0.263276       | 0.0044                 | BQL |
| 0.0045                | 11013920      | 2973305             | 0.269959       | 0.0045                 | BQL |
| 0.0045                | 11008329      | 3002527             | 0.272751       | 0.0045                 | BQL |
| 0.0045                | 10847109      | 2932962             | 0.270391       | 0.0045                 | BQL |
| 0.0045                | 10945576      | 2866581             | 0.261894       | 0.0043                 | BQL |
| 0.0045                | 11087291      | 2996880             | 0.270299       | 0.0045                 | BQL |
| 0.0045                | 11082262      | 3034047             | 0.273775       | 0.0046                 | BQL |
| 0.0045                | 11204192      | 2946500             | 0.262982       | 0.0044                 | BQL |
| <b>Mean</b>           |               |                     |                | 0.0044                 |     |
| <b>Std Dev</b>        |               |                     |                | 0.0001                 |     |
| <b>%RSD</b>           |               |                     |                | 2.5                    |     |
| <b>MDL</b>            |               |                     |                | 0.0003                 |     |

4. **Method Accuracy and Robustness:** Quality control samples, prepared from a secondary stock reference solution, were included in each analytical run in order to assess the accuracy of the analytical procedure. In addition, quality assurance standard solutions were prepared by a secondary analyst and this solution was employed to prepare QA samples at the nominal QC concentration for confirmation of both method robustness and working standard solution 5 month stability. Results for LOD samples are provided in **Table 4**.

**Table 4: QC and QA Replicate Results**

| Nominal Conc. (µg/mL) | ISTD Response | Pooled Ion Response | Response Ratio | Measured Conc. (µg/mL) | % Recovery |
|-----------------------|---------------|---------------------|----------------|------------------------|------------|
| 0.113                 | 11283190      | 69973363            | 6.201558       | 0.1138                 | 101        |
| 0.113                 | 10688513      | 66881171            | 6.257294       | 0.1148                 | 102        |
| 0.113                 | 10702885      | 65751646            | 6.143357       | 0.1127                 | 100        |
| 0.113                 | 11539904      | 68447939            | 5.931413       | 0.1088                 | 96         |
| 0.113                 | 10988492      | 70207933            | 6.389224       | 0.1172                 | 104        |
| 0.113                 | 12273675      | 76321770            | 6.218331       | 0.1141                 | 101        |
| 0.113                 | 12535975      | 74862853            | 5.971841       | 0.1096                 | 97         |
| <b>Mean</b>           |               |                     |                | 0.1130                 | 100        |
| <b>Std Dev</b>        |               |                     |                | 0.0030                 |            |
| <b>%RSD</b>           |               |                     |                | 2.6                    |            |

5. **Method Precision and Accuracy in Pre-Concentrated Sample Matrix:** Spiked field blank matrix samples were prepared at three concentration levels, including the lower limit of quantitation and upper limit of quantitation. These spiked samples were employed to assess the precision and accuracy of the sample pre-concentration procedure.

A surface water sample collected in the field was randomly selected and employed as matrix. The matrix was made alkaline to pH>10 using concentrated ( $\geq 28\%$  ammonia) ammonium hydroxide to a final concentration of approximately 0.1% volume per volume. A volume of 35 mL of this matrix was spiked with AEOs reference material and internal standard prior to dry-down under centrifugal evaporation to dryness. The samples were re-suspended in 0.1% v/v ammonium hydroxide solution to a final volume of 1.4 mL by multi-vortex for 20 to 30 min. The nominal final concentrations of naphthenic acids in the x25 pre-concentrated samples was 0.011, 0.034, and 0.905 µg/mL (corresponding to original concentrations of 0.452, 1.357, and 36.19 µg/L in sample matrix). Results for spiked matrix samples are provided in **Tables 5**.

**Table 5a: Spiked Field Sample Matrix Results**

| Original Sample Nominal Spike Conc. (µg/L) | Final Nominal Spike Conc. (µg/mL) | ISTD Response | Pooled Ion Response | Response Ratio | Measured Conc. (µg/mL) | %Spike Recovery |
|--------------------------------------------|-----------------------------------|---------------|---------------------|----------------|------------------------|-----------------|
| 0                                          | 0                                 | 11495810      | 249197              | 0.021677       | 0.0000 BQL             | na              |
| 0                                          | 0                                 | 11232211      | 390840              | 0.034796       | 0.0006 BQL             | na              |
| 0                                          | 0                                 | 11583765      | 233265              | 0.020137       | 0.0000 BQL             | na              |
| 0                                          | 0                                 | 11155747      | 459746              | 0.041212       | 0.0008 BQL             | na              |
| 0                                          | 0                                 | 10928279      | 300950              | 0.027539       | 0.0003 BQL             | na              |
| 0                                          | 0                                 | 10311237      | 389626              | 0.037787       | 0.0007 BQL             | na              |
| <b>Mean</b>                                |                                   |               |                     |                | 0.0004                 |                 |
| <b>Std Dev</b>                             |                                   |               |                     |                | 0.0004                 |                 |
| 0.452                                      | 0.011                             | 11233076      | 7735780             | 0.688661       | 0.0122                 | 108             |
| 0.452                                      | 0.011                             | 11340382      | 7899978             | 0.696624       | 0.0124                 | 109             |
| 0.452                                      | 0.011                             | 11280815      | 7944766             | 0.704272       | 0.0125                 | 111             |
| 0.452                                      | 0.011                             | 11593475      | 7753317             | 0.668766       | 0.0118                 | 105             |
| 0.452                                      | 0.011                             | 11297837      | 7889380             | 0.698309       | 0.0124                 | 110             |
| 0.452                                      | 0.011                             | 10630158      | 7244864             | 0.681539       | 0.0121                 | 107             |
| <b>Mean</b>                                |                                   |               |                     |                | <b>0.012</b>           | 108             |
| <b>Std Dev</b>                             |                                   |               |                     |                | <b>0.0002</b>          |                 |
| <b>%RSD</b>                                |                                   |               |                     |                | <b>2.0</b>             |                 |
| 1.357                                      | 0.034                             | 11144592      | 22314892            | 2.002307       | 0.0364                 | 107             |
| 1.357                                      | 0.034                             | 11172378      | 22375258            | 2.002730       | 0.0364                 | 107             |
| 1.357                                      | 0.034                             | 11031239      | 21673226            | 1.964714       | 0.0357                 | 105             |
| 1.357                                      | 0.034                             | 11052807      | 21397024            | 1.935891       | 0.0352                 | 104             |
| 1.357                                      | 0.034                             | 10699288      | 21193001            | 1.980786       | 0.0360                 | 106             |
| 1.357                                      | 0.034                             | 11164551      | 22327188            | 1.999829       | 0.0364                 | 107             |
| <b>Mean</b>                                |                                   |               |                     |                | <b>0.0360</b>          | <b>106</b>      |
| <b>Std Dev</b>                             |                                   |               |                     |                | <b>0.0005</b>          |                 |
| <b>%RSD</b>                                |                                   |               |                     |                | <b>1.4</b>             |                 |
| 36.185                                     | 0.905                             | 9544436       | 494833862           | 51.845269      | 0.9548                 | 106             |
| 36.185                                     | 0.905                             | 9957313       | 508428951           | 51.060856      | 0.9403                 | 104             |
| 36.185                                     | 0.905                             | 9807501       | 493442834           | 50.312802      | 0.9265                 | 102             |
| 36.185                                     | 0.905                             | 9842008       | 498582861           | 50.658654      | 0.9329                 | 103             |
| 36.185                                     | 0.905                             | 9683988       | 490221696           | 50.621882      | 0.9322                 | 103             |
| 36.185                                     | 0.905                             | 10052371      | 503941583           | 50.131614      | 0.9232                 | 102             |
| <b>Mean</b>                                |                                   |               |                     |                | <b>0.9350</b>          | <b>103</b>      |
| <b>Std Dev</b>                             |                                   |               |                     |                | <b>0.0113</b>          |                 |
| <b>%RSD</b>                                |                                   |               |                     |                | <b>1.2</b>             |                 |

**Table 5b: Precision Analysis for Spiked Field Sample Matrix**

| <b>Original Sample Nominal Spike Conc. (µg/L)</b> | <b>Final Nominal Conc. (µg/mL)</b> | <b>Result #1 (x1)</b> | <b>Duplicate of Result #1 (x2)</b> | <b>Difference x2-x1</b> | <b>Average (x2+x1)/2</b> | <b>Difference/Average</b> |
|---------------------------------------------------|------------------------------------|-----------------------|------------------------------------|-------------------------|--------------------------|---------------------------|
| 0.452                                             | 0.011                              | 0.0122                | 0.0118                             | 0.000                   | 0.012                    | -0.030                    |
| 0.452                                             | 0.011                              | 0.0124                | 0.0124                             | 0.000                   | 0.012                    | 0.003                     |
| 0.452                                             | 0.011                              | 0.0125                | 0.0121                             | 0.000                   | 0.012                    | -0.034                    |
| 1.357                                             | 0.034                              | 0.0364                | 0.0352                             | -0.001                  | 0.036                    | -0.034                    |
| 1.357                                             | 0.034                              | 0.0364                | 0.0360                             | 0.000                   | 0.036                    | -0.011                    |
| 1.357                                             | 0.034                              | 0.0357                | 0.0364                             | 0.001                   | 0.036                    | 0.018                     |
| 36.185                                            | 0.905                              | 0.9548                | 0.9329                             | -0.022                  | 0.944                    | -0.023                    |
| 36.185                                            | 0.905                              | 0.9403                | 0.9322                             | -0.008                  | 0.936                    | -0.009                    |
| 36.185                                            | 0.905                              | 0.9265                | 0.9232                             | -0.003                  | 0.925                    | -0.004                    |
|                                                   |                                    |                       |                                    |                         | <b>%RSD</b>              | 1.3                       |
|                                                   |                                    |                       |                                    |                         | <b>% MU</b>              | 2.6                       |

**Table 6: Effect of Acidic Cold Storage and pH Adjustment on O4 Acid Species Measured in AEOs.**

| Nominal Spiking Conc. for O4 NA Species from AEOs (mg/L) | Measured O4 NA Species Conc. (mg/L) in Original Alkaline Solutions | Post Refrigerated Storage at Acid pH3 |                                            | Post Refrigerated Storage at Acidic pH3 and Readjusted to Alkaline pH $\geq$ 10 in Original Container |                                            |
|----------------------------------------------------------|--------------------------------------------------------------------|---------------------------------------|--------------------------------------------|-------------------------------------------------------------------------------------------------------|--------------------------------------------|
|                                                          |                                                                    | Measured O4 NA Species Conc. (mg/L)   | % Recovery from Original Measured O4 Conc. | Measured O4 NA Species Conc. (mg/L)                                                                   | % Recovery from Original Measured O4 Conc. |
| 0.45                                                     | 0.46                                                               | 0.19                                  | 41                                         | 0.42                                                                                                  | 93                                         |
| 0.45                                                     | 0.44                                                               | 0.23                                  | 52                                         | 0.44                                                                                                  | 97                                         |
| 0.91                                                     | 0.83                                                               | 0.40                                  | 47                                         | 0.84                                                                                                  | 99                                         |
| 0.91                                                     | 0.87                                                               | 0.45                                  | 53                                         | 0.85                                                                                                  | 99                                         |
| 2.26                                                     | 2.10                                                               | 1.14                                  | 55                                         | 2.01                                                                                                  | 97                                         |
| 2.26                                                     | 2.06                                                               | 1.18                                  | 57                                         | 2.04                                                                                                  | 98                                         |
| 4.53                                                     | 4.31                                                               | 2.19                                  | 51                                         | 4.05                                                                                                  | 94                                         |
| 4.53                                                     | 4.34                                                               | 2.01                                  | 46                                         | 4.14                                                                                                  | 96                                         |
| 9.05                                                     | 9.15                                                               | 4.41                                  | 50                                         | 8.33                                                                                                  | 94                                         |
| 9.05                                                     | 8.65                                                               | 3.80                                  | 43                                         | 8.86                                                                                                  | 100                                        |
| Mean % Recovery from Original                            |                                                                    | 49                                    |                                            | 97                                                                                                    |                                            |

**Table 7: Comparison of the current method with other published methods**

|                                            | <b>Current method<br/>(Brunswick et al.)</b>                                                                       | <b>Brunswick et al.,<br/>2015</b>                  | <b>Zhang et al.,<br/>2014</b>        | <b>Woudneh et al.,<br/>2013</b>                                                                                         | <b>Ross et al.,<br/>2012</b>                                              | <b>Bataineh et al.<br/>2006</b>                    |
|--------------------------------------------|--------------------------------------------------------------------------------------------------------------------|----------------------------------------------------|--------------------------------------|-------------------------------------------------------------------------------------------------------------------------|---------------------------------------------------------------------------|----------------------------------------------------|
| <b>Standard matrix</b>                     | Acid extracted organics (AEOs) from fresh oil sands process water<br>Note: method can accommodate any NA standard. | Merichem standard                                  | Merichem standard                    | Derivatized 1-Pyrenebutyric acid in combination with a calculated "factor" of 0.38 for ratio into Merichem equivalents. | Merichem standard                                                         | Merichem and AEOs                                  |
| <b>Naphthenic acid species application</b> | $C_nH_{2n+z}$<br>O <sub>2</sub> and O <sub>4</sub>                                                                 | $C_nH_{2n+z}$<br>O <sub>2</sub> and O <sub>4</sub> | $C_nH_{2n+z}$<br>O <sub>2</sub> only | $C_nH_{2n+z}$<br>O <sub>2</sub> only                                                                                    | Non routine analysis for fingerprinting of NA profiles                    | $C_nH_{2n+z}$<br>O <sub>2</sub> and O <sub>4</sub> |
| <b>Instrument mass accuracy</b>            | ±5ppm high resolution QToF                                                                                         | ±5ppm high resolution QToF                         | ±5ppm high resolution Orbitrap       | Low resolution MS/MS                                                                                                    | High resolution Orbitrap (mass resolution reported as ~30,000 at m/z 250) | <10ppm high resolution QToF                        |
| <b>MS mode</b>                             | ESI -ve                                                                                                            | ESI -ve                                            | ESI -ve                              | ESI +ve (derivatized ions to single MRM at 129 m/z).<br>No confirmation of % derivatization of homologs                 | ESI -ve                                                                   | ESI -ve                                            |
| <b>Sample storage</b>                      | Samples stored                                                                                                     | Samples stored                                     | No sample                            | Samples stored                                                                                                          | Sample                                                                    | Samples stored                                     |



|                                      |                                                                                                                                                                                                                                                                                                                                                                                                         |                                                                         |                                                                           |                                                                                                            |                                                                                                        |                                                                                                                                                                                                                                                                            |
|--------------------------------------|---------------------------------------------------------------------------------------------------------------------------------------------------------------------------------------------------------------------------------------------------------------------------------------------------------------------------------------------------------------------------------------------------------|-------------------------------------------------------------------------|---------------------------------------------------------------------------|------------------------------------------------------------------------------------------------------------|--------------------------------------------------------------------------------------------------------|----------------------------------------------------------------------------------------------------------------------------------------------------------------------------------------------------------------------------------------------------------------------------|
|                                      | refrigerated until extraction.                                                                                                                                                                                                                                                                                                                                                                          | refrigerated until extraction.                                          | storage details.                                                          | at -4 °C prior to extraction.                                                                              | transferred to polypropylene with 10mL methanol rinse and frozen prior to extraction.                  | refrigerated until extraction.                                                                                                                                                                                                                                             |
| <b>Sample aliquot and processing</b> | <p>Sample made alkaline to &gt;pH10 prior to aliquot.</p> <p>Spiking with internal standard and pre-concentration by rotary evaporation.<br/>Note: minimal processing achieves improved sensitivity without issues relating to extraction solvent, acid pH precipitation, and derivatization selectivity.<br/>Acidic pH avoided due to known NA precipitation and losses reported in current paper.</p> | Sample only indicated as adjusted to >pH10 after aliquot.               | liquid/liquid, dry down, SPE silica, elute DCM, dry down and reconstitute | pH 5-7, SPE silica, elute methanol, dry-down, redry-down 40°C, derivatize 20min at 60°C plus 15min at 60°C | pH to acid using H2SO4, spiked with internal standard, liquid/liquid in DCM, dry down and reconstitute | pH to 11 with NaOH, centrifuge, pH to <2 with H2SO4 liquid/liquid in acidic ethyl acetate, wash with NaCl, dry over Na2SO4, dry down and reconstitute ethyl acetate, dry down, SPE at pH3, final residue in 60% meOH with 0.1% formic acid. (final x50 pre-concentration ) |
| <b>Surrogate standard</b>            | Single internal standard, decanoic-d3 acid added pre sample processing.                                                                                                                                                                                                                                                                                                                                 | Single internal standard, decanoic-d3 acid added pre sample processing. | Octanoic-d15 acid (C8 deuterated caprylic saturated fatty acid)           | Decanoic-2H19 acid (C10 tritiated capric saturated fatty acid)<br>Hexadecanoic-2H31 acid                   | Tetradecanoic- <sup>13</sup> C acid                                                                    | Tetradecanoic- <sup>13</sup> C acid                                                                                                                                                                                                                                        |

|                          |                                                                                                                                                                                                                                                                                                                                |                                                                              |                                                                                                        |                                                                                                                                                                                                                 |                                             |                                                                                                                                                               |
|--------------------------|--------------------------------------------------------------------------------------------------------------------------------------------------------------------------------------------------------------------------------------------------------------------------------------------------------------------------------|------------------------------------------------------------------------------|--------------------------------------------------------------------------------------------------------|-----------------------------------------------------------------------------------------------------------------------------------------------------------------------------------------------------------------|---------------------------------------------|---------------------------------------------------------------------------------------------------------------------------------------------------------------|
|                          |                                                                                                                                                                                                                                                                                                                                |                                                                              | Hexadecanoic-d2 acid (C16 deuterated palmitic saturated fatty acid)                                    | (C16 tritiated palmitic saturated fatty acid)                                                                                                                                                                   |                                             |                                                                                                                                                               |
| <b>Internal standard</b> | <p>Single internal standard, decanoic-d3 acid added pre sample processing.</p> <p>Note: reduced sample preparation. All published methods use internal standards that are linear and unrelated to the complex NA structures. No amount of internal standards can compensate for all of the potential NA compounds present.</p> | Single internal standard, decanoic-d3 acid                                   | Myristic-d27 acid (C14 deuterated saturated fatty acid) (C16 deuterated palmitic saturated fatty acid) | Atrazine-13C3 (herbicide, aromatic amine with N ring and chlorine) Reported that when suppression IS observed the extract diluted and reanalyzed to bring the recovery values for atrazine-13C3 within 50–150%. | None listed                                 | None listed but model compounds used to assess matrix versus matrix free OSPW.                                                                                |
| <b>Spiked samples</b>    | <p>Surface water samples 0.452 µg/L AEOs (or 0.00452 mg/L) Accuracy 108 ±3% recovery Precision 2.0%RSD</p> <p>Note: significant improvement of sensitivity using the current method together with good</p>                                                                                                                     | Surface water samples Merichem 0.05 mg/L (50 µg/L) accuracy 90-110% recovery | Surface water samples Merichem accuracy recovery 40-110% for D15-C8:0<br><br>80-110% for D2-C16:0      | Surface water samples Merichem 7.72 µg/500mL (0.0154 mg/L) accuracy 40 130%<br><br>38.6 µg/500mL (0.0772mg/L) accuracy 47 150%                                                                                  | Not reported, fingerprinting analysis only. | Lab water samples with model compounds accuracy 60-84% recovery and 89-126% when corrected using surrogate.<br><br>Spiked OSPW at 2.5 ppm (mg/L) accuracy was |

|                                                                      |                                                                                                                                                                                                                                                        |                                                              |                                                                                                                               |                                                                                                                                                                          |                                                                                                                           |                                                                                           |
|----------------------------------------------------------------------|--------------------------------------------------------------------------------------------------------------------------------------------------------------------------------------------------------------------------------------------------------|--------------------------------------------------------------|-------------------------------------------------------------------------------------------------------------------------------|--------------------------------------------------------------------------------------------------------------------------------------------------------------------------|---------------------------------------------------------------------------------------------------------------------------|-------------------------------------------------------------------------------------------|
|                                                                      | precision and accuracy.                                                                                                                                                                                                                                |                                                              |                                                                                                                               |                                                                                                                                                                          |                                                                                                                           | 79-108% recovery of model compounds but suppression and 67% accuracy for C8 compound.     |
| <b>Method LOD/LOQ (excludes sample processing pre-concentration)</b> | Method for AEOs<br>LOD 0.0003 µg/mL<br>LOQ 0.011 µg/mL                                                                                                                                                                                                 | Method for Merichem NA<br>LOD 0.0004 µg/mL<br>LOQ 0.02 µg/mL | Method for saturated straight chain fatty acid apparent (SSFAs)<br><br>LOD 0.007 to 0.017 µg/mL<br><br>LOQ 0.02 to 0.05 µg/mL | Method for 1-Pyrenebutyric acid<br>MDL 0.0025 µg/mL (adjusted for sample size and extract volume-detection limit varies as a result of chromatographic noise in samples) | Method for Merichem NA<br>LOQ 0.0002 µg/mL (no validation data provided)                                                  | Method for Merichem NA<br>LOQ 100 µg/mL<br><br>LOD on-column 24 to 528 pg model compounds |
| <b>Interferences</b>                                                 | The environmental estrogen pollutants estrone, E2, EE2 were demonstrated to show no interference at the retention times for the NA, although the potential for interference in low resolution MS is noted. Similarly, fatty acids and humic acids were | No reported                                                  | Not reported                                                                                                                  | N-acyl urea reaction by product shown to be constant. Humic acids used for relative retention time. Due to surface water contamination with fatty acids, straight chain  | Potential for distinguishing bitumen derived NA from biologically derived fatty acids noted by non-routine fingerprinting | None reported                                                                             |

|  |                                                                                                                                                                                                                                                                                                                                                                                                                                         |  |  |                                                                                                                                             |  |  |
|--|-----------------------------------------------------------------------------------------------------------------------------------------------------------------------------------------------------------------------------------------------------------------------------------------------------------------------------------------------------------------------------------------------------------------------------------------|--|--|---------------------------------------------------------------------------------------------------------------------------------------------|--|--|
|  | <p>identified by the method procedure for inclusion or rejection.</p> <p>Note: while two other publications have reported potential for humic and fatty acid interference, they did not provide any evidence. The current work provides chromatographic and high resolution qualitative identification evidence of the potential. It additionally includes review of interference from prevalent estrogen environmental pollutants.</p> |  |  | <p>isomer peaks were consistently excluded from the data (peak identity confirmed by spiking study for selected saturated fatty acids).</p> |  |  |
|--|-----------------------------------------------------------------------------------------------------------------------------------------------------------------------------------------------------------------------------------------------------------------------------------------------------------------------------------------------------------------------------------------------------------------------------------------|--|--|---------------------------------------------------------------------------------------------------------------------------------------------|--|--|
